# Supplementary material
Source: HighWire-hosted journal article supplement (http://molpharm.aspetjournals.org/highwire/filestream/80776/field_highwire_adjunct_files/0/108712Suppl_Data.pdf)
Supplement: 108712Suppl_Data.pdf [file 108712Suppl_Data.pdf]

A functional Nav1.7- NavAb chimera with a reconstituted high affinity ProTx-II binding site

Ramkumar Rajamani, Sophie Wu, Iyonce Rodrigo, Mian Gao, Simon Low, Lisa Megson, David Wensel, Rick L. Pieschl, Debra J. Post-Munson, John Watson, David R. Langley, Michael K. Ahlijanian, Linda J. Bristow, and James Herrington

Address for correspondence:

Ramkumar Rajamani, Ph.D.

Bristol-Myers Squibb

5 Research Parkway

Wallingford, CT 06492

Ramkumar.Rajamani@bms.com

Supplemental Figure 1. Chimeric NavAb-DII-S1-S4 and NavAb-DII-S3-S4 amino acid sequence of channels expressed in Sf9 cells.

### NavAb-DII-S1-S4

MDYKDDDDDKGSLVPRGSHMYLRITNIVESSFFTKFITI  
CIVLNTLFMAMEHHPMTEEFKNVLAIGNLVFTGIFAAE  
IILRIYVHRISFFKDPWSLFDFFVVTLSLVELFLADVE  
GLSVLRSFRLRLFRRLVTAVPQMRKIVSALISVIPGML  
SVIALMTLFFYIFAIMATQLFGERFPEWFGTLGESFYT  
LFQVMTLESWSMGIVRPLMEVYPYAWVFFIPFIFVVT  
VMINLVVAIIVDAMAILNQKEEQHIIDEVQSHEDNINN  
EIIKLREEIIVELKELIKTSLKN

### NavAb-DII-S3-S4

MDYKDDDDDKGSLVPRGSHMYLRITNIVESSFFTKFIIY  
LIVLNGITMGLETSTFMQSFQVYTTLNFQIVITIFTI  
EIIILRIYVHRISFFKDPWSLFDFFVVTLSLVELFLADV  
EGLSVLRSFRLRLFRRLVTAVPQMRKIVSALISVIPGM  
LSVIALMTLFFYIFAIMATQLFGERFPEWFGTLGESFY  
TLFQVMTLESWSMGIVRPLMEVYPYAWVFFIPFIFVVT  
FVMINLVVAIIVDAMAILNQKEEQHIIDEVQSHEDNIN  
NEIIKLREEIIVELKELIKTSLKN

Supplemental Figure 2. Functional expression of NavAb channels in Sf9 cells. A. Representative recording from a non-transduced Sf9 cell. Currents in response to 20 ms step depolarizations between -120 mV and +120 mV in 10 mV increments are shown. B. Representative recording from a Sf9 cell transduced with BacMam encoding wild-type NavAb. Currents were evoked by 20 ms step depolarizations between -140 mV and 0 mV. For clarity, step depolarizations in 20 mV increments are shown.

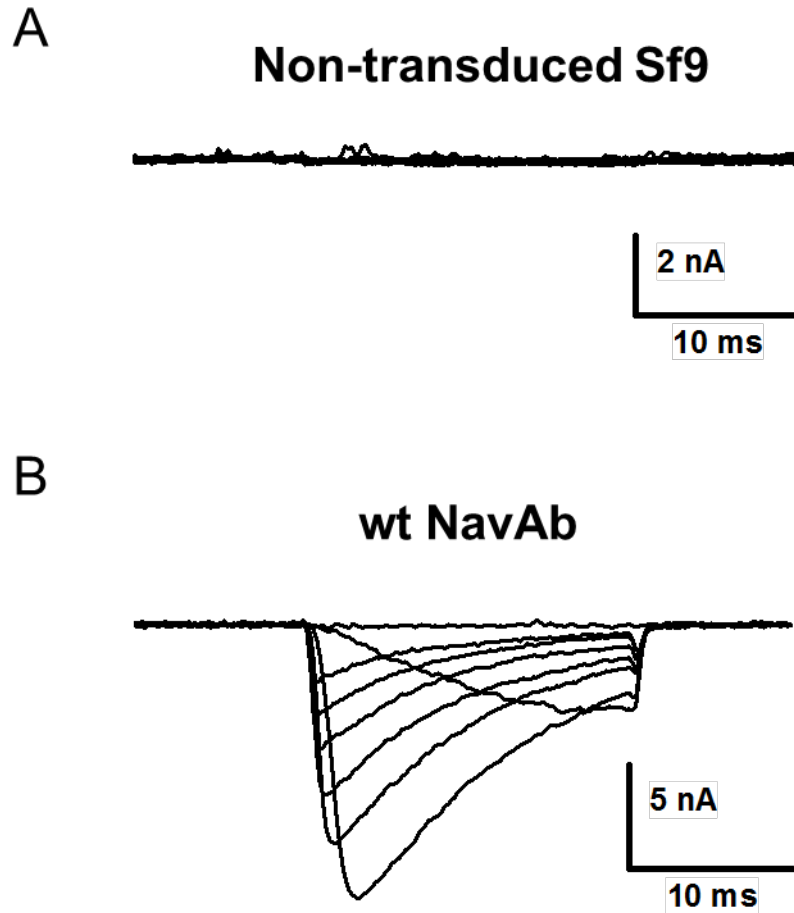

Supplemental Figure 3. Functional expression of DII S3-S4 chimera in Sf9 cells. A. Representative recording from a Sf9 cell transduced with BacMam encoding DII S3-S4 chimera. Currents in response to 20 ms step depolarizations between -140 mV and 0 mV in 10 mV increments are shown. B. Plot of mean relative conductance ( $\pm$  S.E.M.) versus step potential for DII S3-S4 chimera channels estimated from tail current analysis. Tail current amplitudes were normalized to the amplitude following the step to 0 mV for each cell ( $n=7$ ). The solid line is a fit of the Boltzmann equation to the data. Parameters of the fit are given in Table 1.

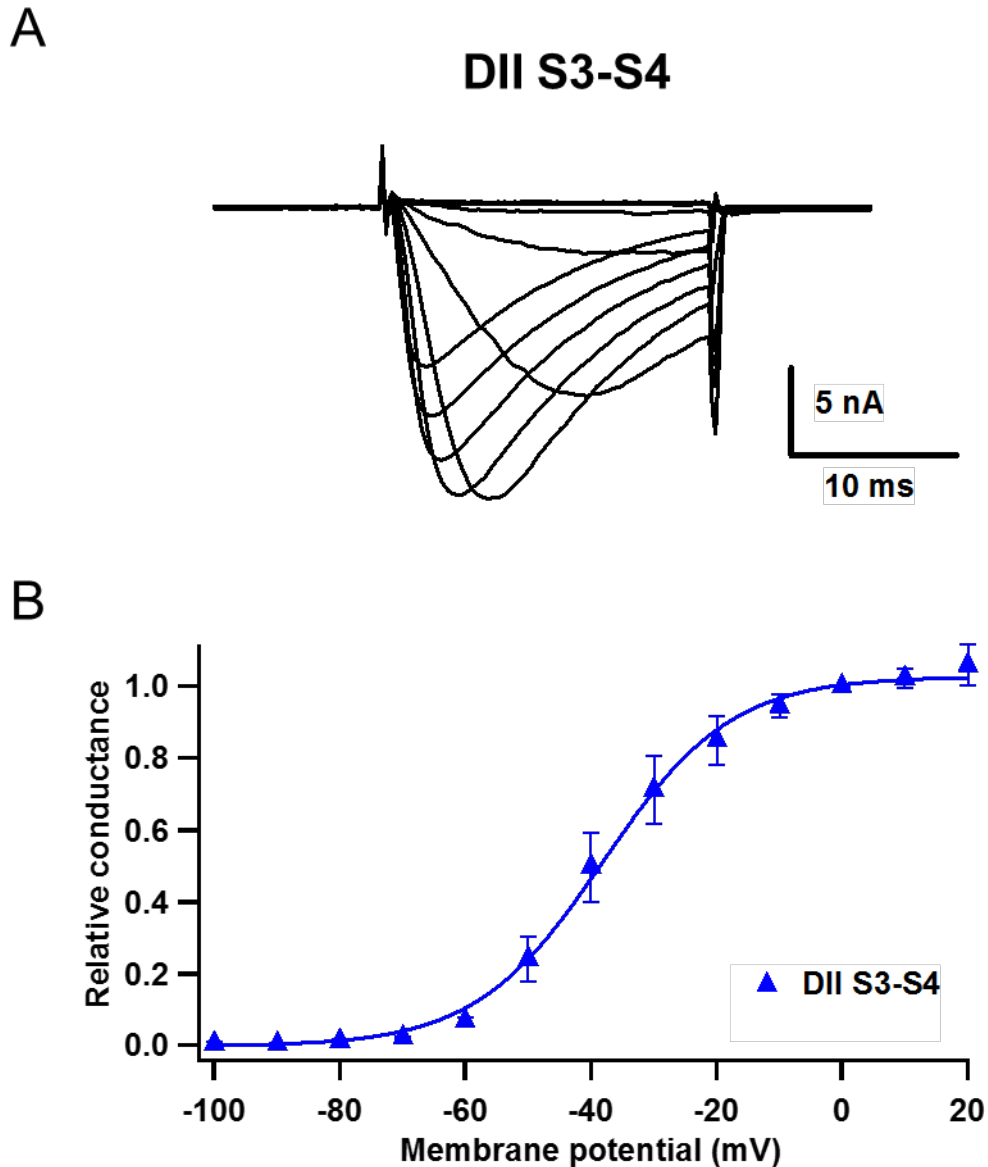

Supplemental Figure 4. Effect of ProTx-II on the voltage-dependent gating of DII S1-S4 chimera channels. Plot of mean relative conductance ( $\pm$  S.E.M.) versus step potential for DII S3-S4 chimera channels in control (circles) and following application of 100 nM ProTx-II (squares). Conductance was estimated from peak current measurements and normalized to the conductance following the control step to +120 mV for each cell ( $n=7$ ). The solid line is a fit of the Boltzmann equation to the data. Parameters of the fit in Control are:  $V_{1/2} = 52.7$  mV, slope = 15.1 mV, Maximum conductance = 1.0. For the fit in 100 nM ProTx-II, the parameters are:  $V_{1/2} = 106.8$  mV, slope = 14.8 mV, maximum conductance = 0.76.

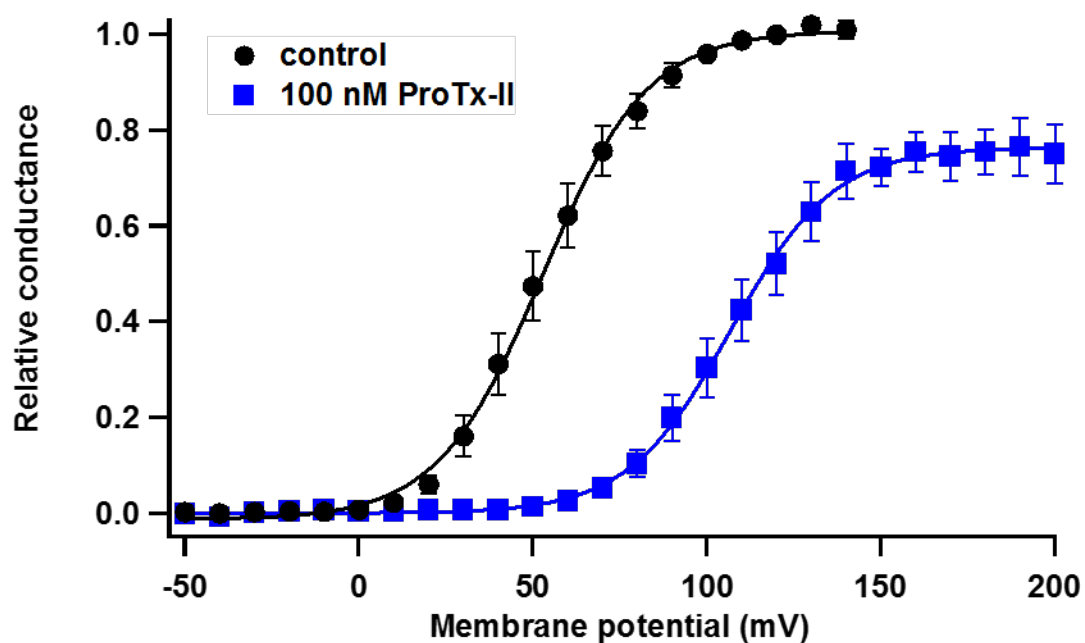

Supplemental Figure 5. Purified NavAb DII S1-S4 chimera. Representative SDS-PAGE gel of the final purified material stained with Instant Blue. Lanes 1, 3 and 5 were loaded with 2  $\mu$ g, 4  $\mu$ g or 8  $\mu$ g protein, respectively. MW markers were loaded in lanes 2 and 4.

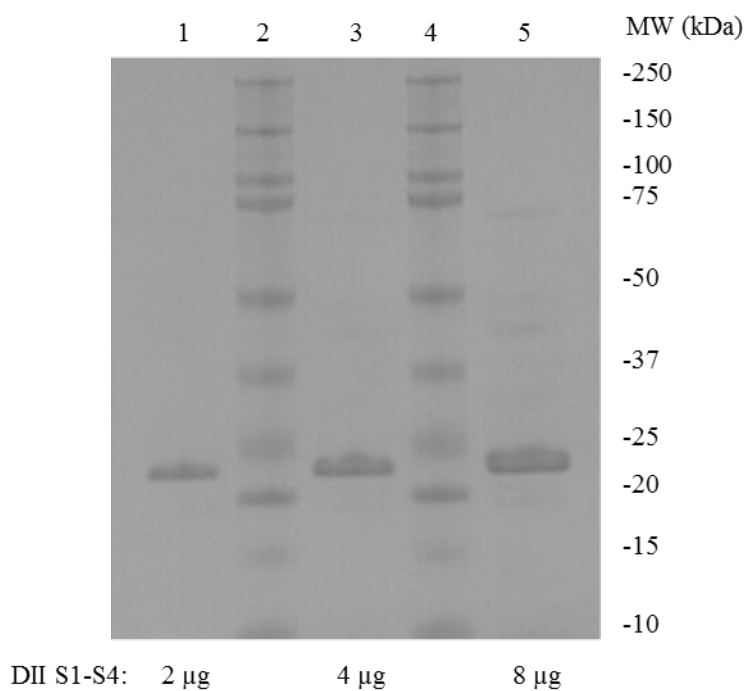

Supplemental Figure 6. Specific binding of [ $^{125}$ I]ProTx-II to purified DII S1-S4 chimera but not DII S3-S4 chimera. Biotinylated DII S3-S4 or DII S1-S4 protein (0.3  $\mu$ g) in DDM were incubated with 1.67 nM [ $^{125}$ I]ProTx-II. To define non-specific (NS) binding, cold ProTx-II (2  $\mu$ M) was included in the binding reaction. Mean cpm  $\pm$  S.E.M. (n=3) are plotted.

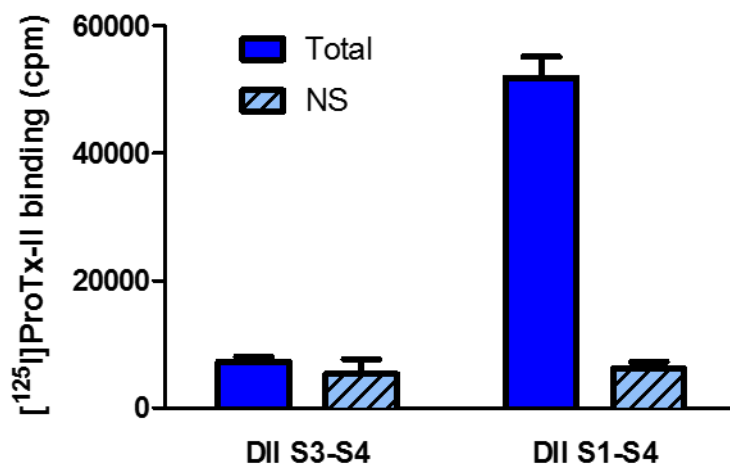

Supplemental Figure 7. Saturation binding of [ $^{125}$ I]ProTx-II to purified DII S1-S4 chimera. DII S1-S4 protein was incubated with 0.2-10.5 nM [ $^{125}$ I]ProTx-II and specific binding determined. Mean bound [ $^{125}$ I]ProTx-II bound  $\pm$  S.E.M. is plotted versus free [ $^{125}$ I]ProTx-II concentration. Each point represents the mean of five experiments measured in triplicate. The solid line is a fit of a single site model to the data with the parameters  $B_{\max} = 309$  nmol/mg,  $K_d = 9.8$  nM.

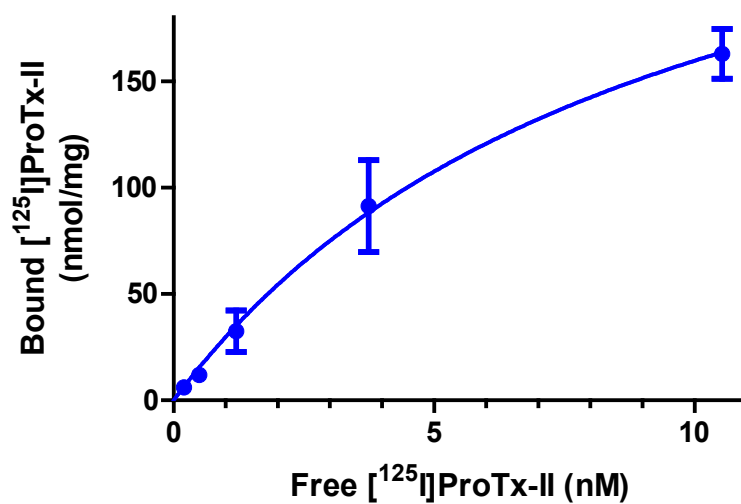



Supplemental Table 1. Activation parameters of wild-type and chimeric channels. Values are derived from the fits of the Boltzmann equation to the normalized mean conductance versus membrane potential. For wt NavAb, wt hNav1.7 and DII S3-S4 chimera, conductance was estimated from peak current measurements. For the DII S1-S4 chimera, tail current amplitudes were used to estimate conductance.

| <b>Channel</b>    | <b><math>V_{1/2}</math> (mV)</b> | <b>slope (mV)</b> |
|-------------------|----------------------------------|-------------------|
| <b>wt NavAb</b>   | -93.4                            | 7.7               |
| <b>wt hNav1.7</b> | -19.4                            | 6.9               |
| <b>DII S1-S4</b>  | +51.8                            | 12.3              |
| <b>DII S3-S4</b>  | -38.1                            | 10.2              |
